# Supplementary material for: Development and validation of a climate-based ensemble prediction model for West Nile Virus infection rates in Culex mosquitoes, Suffolk County, New York
Source: PubMed Central journal article supplement (PMC4979155; doi:10.1186/s13071-016-1720-1), 2016-08-09

**2013**

• Observations

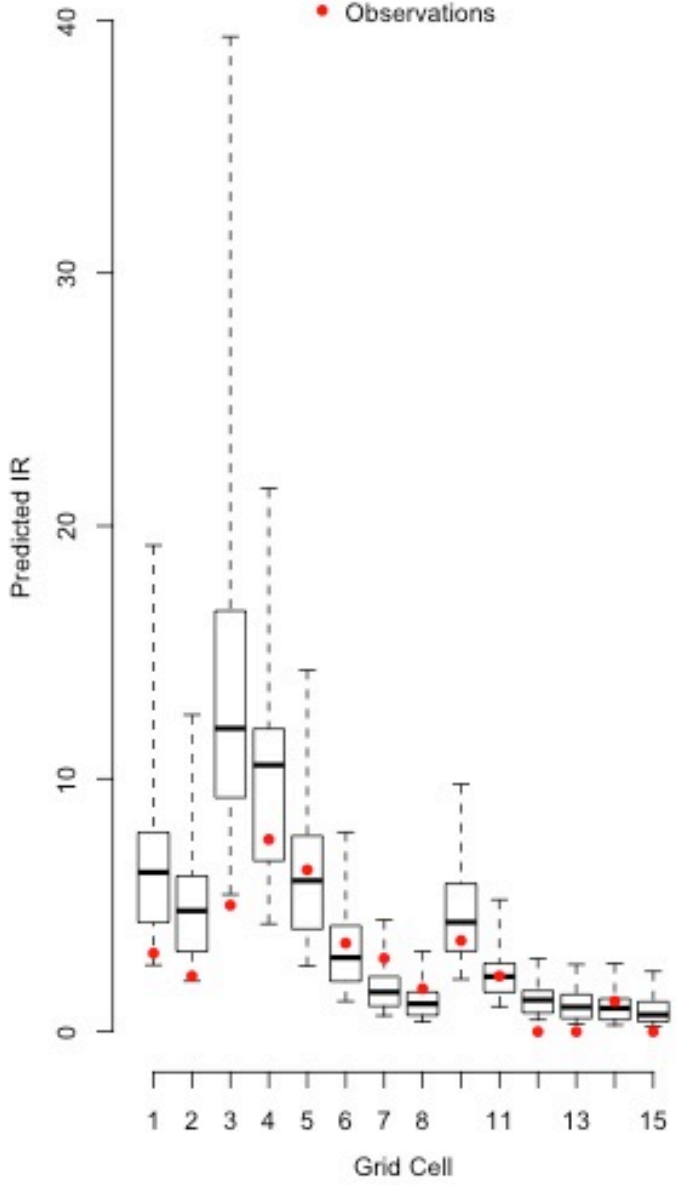

**2014**

• Observations

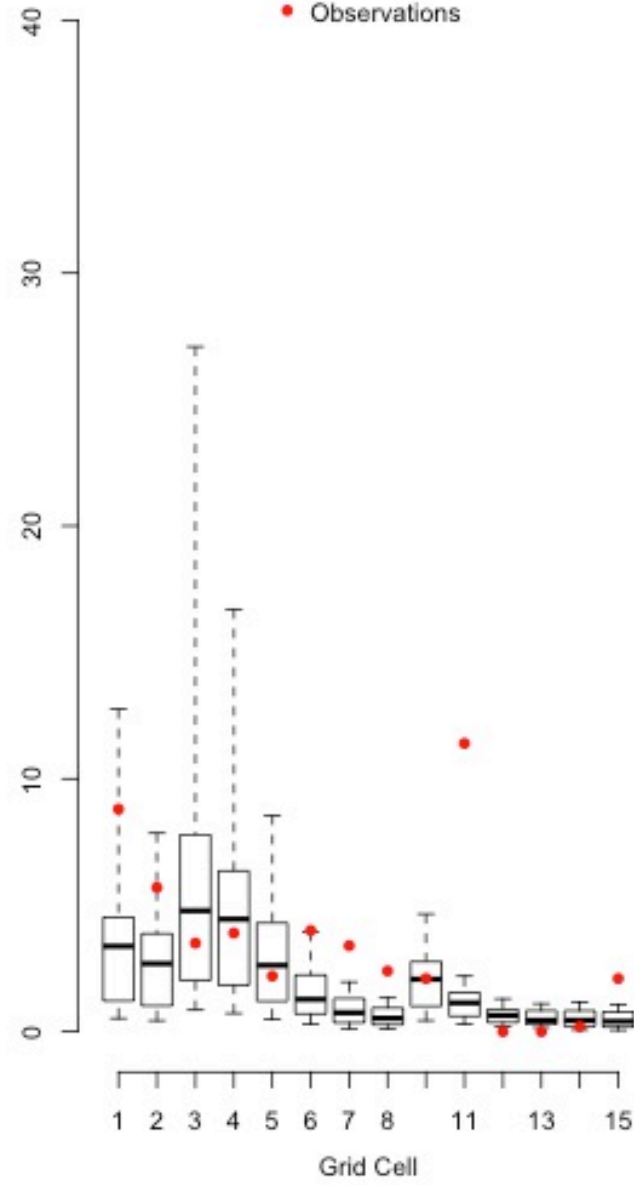

**2015**

• Observations

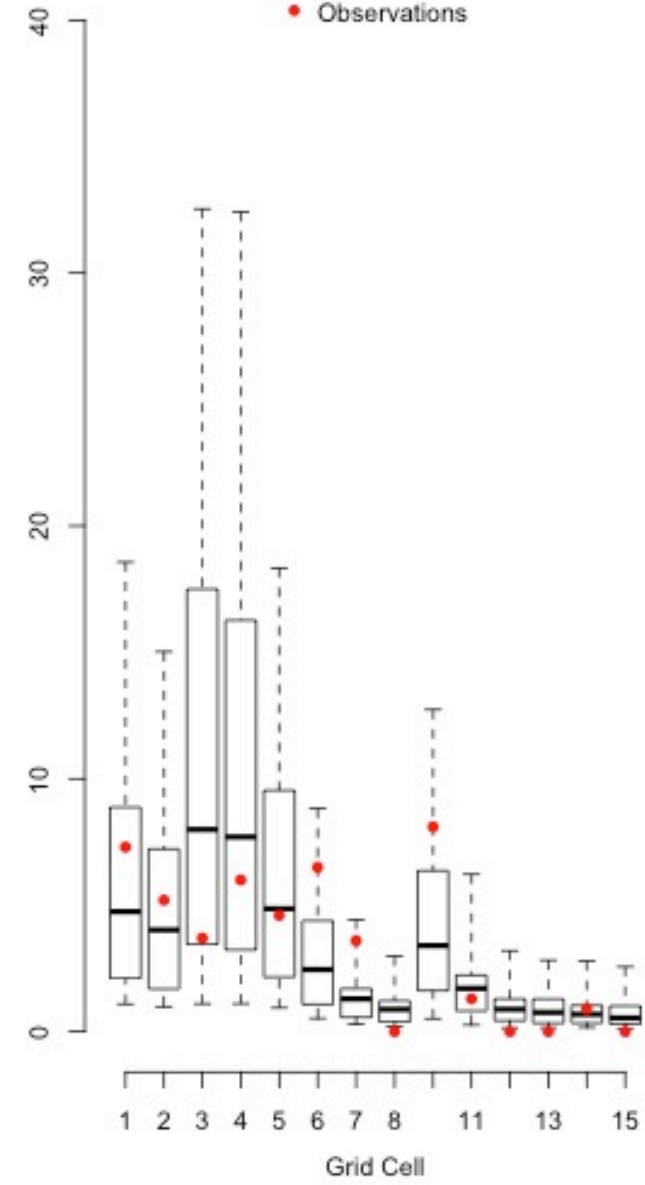

Supplement: 13071_2016_1720_MOESM1_ESM.pdf [file 13071_2016_1720_MOESM1_ESM.pdf]
