# Supplementary material for: Development and validation of a climate-based ensemble prediction model for West Nile Virus infection rates in Culex mosquitoes, Suffolk County, New York
Source: PubMed Central journal article supplement (PMC4979155; doi:10.1186/s13071-016-1720-1), 2016-08-09

### Parameter Importance

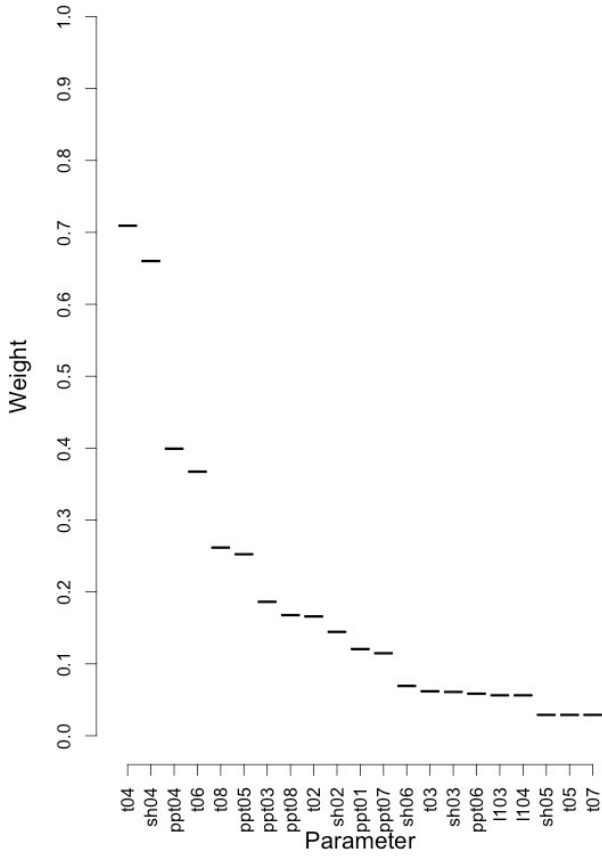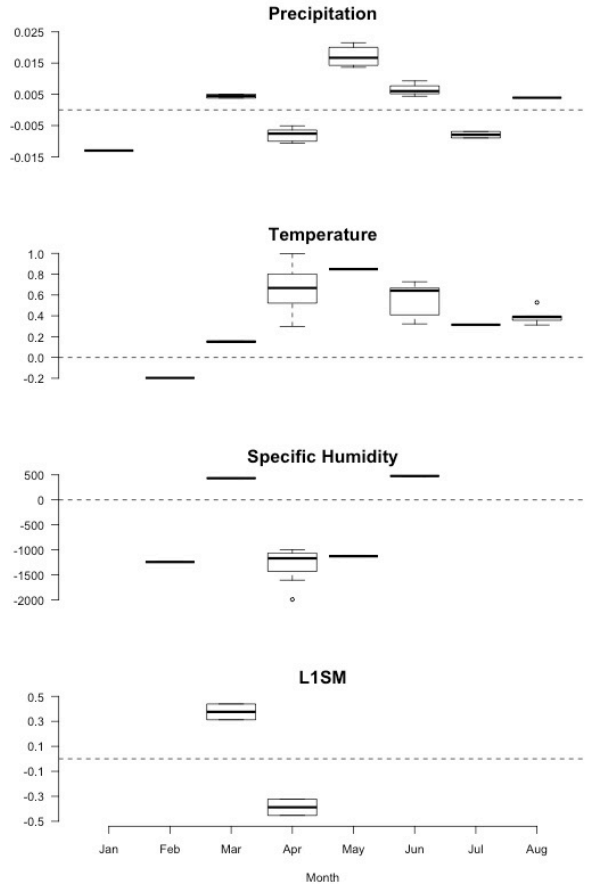

Supplement: 13071_2016_1720_MOESM2_ESM.pdf [file 13071_2016_1720_MOESM2_ESM.pdf]
